# Supplementary material
Source: Research Square preprint supplement (doi:10.21203/rs.3.rs-10077558/v1)
Supplement: Supplementary file 1 [file 00a3235eddcb87fa09e225df.docx]

| **Table S1. Descriptive statistics and values of all the edge weights** | | | | | | |  | | | | | | |
| --- | --- | --- | --- | --- | --- | --- | --- | --- | --- | --- | --- | --- | --- |
| **Variable** | **Min** | **Max** | **M** | **SD** | **1** | **2** | **3** | **4** | **5** | **6** | | **7** | **8** |
| 1. MADRE Dreams affecting daytime  mood | 0 | 7 | 3.99 | 2.28 |  |  |  |  |  | |  |  |  |
| 2. MADRE Dreams recall | 0 | 6 | 4.15 | 1.57 | 0.13 |  |  |  |  | |  |  |  |
| 3. MADRE Emotional intensity | 0 | 4 | 2.56 | 1.08 | 0.18 | 0.26 |  |  |  | |  |  |  |
| 4. MADRE Emotional tone | -2 | 2 | -0.29 | 0.71 | -0.06 | 0.00 | -0.09 |  |  | |  |  |  |
| 5. MADRE Telling dreams | 0 | 7 | 5.06 | 1.75 | 0.19 | 0.47 | 0.00 | 0.07 |  | |  |  |  |
| 6. PSWQ | 20 | 80 | 59.53 | 14.16 | 0.07 | 0.00 | 0.00 | -0.12 | 0.00 | |  |  |  |
| 7. DASS-21 Depression | 0 | 21 | 10.79 | 5.35 | 0.00 | 0.00 | 0.00 | -0.12 | 0.00 | | 0.06 |  |  |
| 8. DASS-21 Anxiety | 0 | 21 | 9.36 | 4.88 | 0.13 | -0.03 | 0.01 | -0.01 | 0.00 | | 0.10 | 0.26 |  |
| 9. DASS-21 Stress | 0 | 21 | 12.85 | 4.46 | 0.00 | 0.00 | 0.06 | 0.00 | 0.03 | | 0.35 | 0.33 | 0.43 |
| *N* = 389; MADRE, Mannheim Dream questionnaire; PSWQ, Penn State-Worry Questionnaire; DASS-21, Depression Anxiety Stress Scale – 21; *Min*, minimum value; *Max*, maximum value; *M*, mean; *SD*, standard deviation. | | | | | | | | | | | | | |
|  |
|  |
