# Supplementary material
Source: Research Square preprint supplement (doi:10.21203/rs.3.rs-10077558/v1)
Supplement: Supplementary file 2 [file 69722a71f2d0e1fe1ebde0b8.docx]

**Table 1.** Main sociodemographic and sleep-related (i.e. time to fall asleep and emotional status before sleep) characteristics of the studied sample

| Characteristics | *n* (%) | *M* | *SD* |
| --- | --- | --- | --- |
| Age (in years) |  | 24.24 | 7.45 |
| *Gender* |  |  |  |
| Male | 50 (12.9) |  |  |
| Female | 330 (84.8) |  |  |
| Non binary | 9 (2.3) |  |  |
| *Education* |  |  |  |
| Primary or middle school diploma | 30 (7.7) |  |  |
| High school diploma | 232 (59.6) |  |  |
| Graduate | 127 (28.3) |  |  |
| *Time to fall asleep* |  |  |  |
| 10 – 15 minutes | 135 (34.7) |  |  |
| 15 – 30 minutes | 150 (38.5) |  |  |
| > 30 minutes | 104 (26.8) |  |  |
| *Emotional status before sleep* |  |  |  |
| Relaxed | 152 (39,2) |  |  |
| Sad / melancholy | 65 (16.6) |  |  |
| Anxious / worried | 135 (34.7) |  |  |
| Frustrated | 27 (7.0) |  |  |
| Guilty / sense of guilt | 7 (1.9) |  |  |
| Other | 3 (0.7) |  |  |
